# Supplementary material for: CO activation and methanation mechanism on hexagonal close-packed Co catalysts: effect of functionals, carbon deposition and surface structure
Source: Royal Society of Chemistry journal article supplement (doi:10.1039/d0cy00499e), 2020-01-01
Supplement: d0cy00499e1.pdf [file d0cy00499e1.pdf]

**Electronic Supplementary Information for:**

**CO Activation and Methanation Mechanism on Hexagonal  
Close-packed Co Catalysts: Effect of Functionals, Carbon  
Deposition and Surface Structure**

*Hai-Yan Su, Changlin Yu, Jin-Xun Liu, Yonghui Zhao, Xiufang Ma, Jie Luo, Chenghua  
Sun, Wei-Xue Li\* and Keju Sun\**

|                                                                                                             |   |
|-------------------------------------------------------------------------------------------------------------|---|
| <b>S1.</b> Effect of ZPE corrections on Co(0001) .....                                                      | 2 |
| <b>S2.</b> Adsorption energies, geometries and coverages of intermediates on Co(0001) .....                 | 3 |
| <b>S3.</b> Energetic, geometries and rates for elementary reactions on Co(0001) .....                       | 4 |
| <b>S4.</b> Energetic for CH <sub>2</sub> O and CHOH on various Co surfaces .....                            | 5 |
| <b>S5.</b> Effect of temperatures on species coverages and reaction order on Co(0001) .....                 | 6 |
| <b>S6.</b> Effect of functionals on the adsorption energies of C <sub>1</sub> -oxygenates on Co(0001) ..... | 7 |
| <b>S7.</b> Microkinetic modeling .....                                                                      | 8 |

**Table S1.** The activation energies ( $\Delta E_{\text{act}}$  in eV) and reaction energies ( $\Delta H$  in eV) of selected surface reactions with or without ZPE corrections.

| Reactions                                                                   | $\Delta E_{\text{act}}$ |      | $\Delta H$ |       |
|-----------------------------------------------------------------------------|-------------------------|------|------------|-------|
|                                                                             | No ZPE                  | ZPE  | No ZPE     | ZPE   |
| $\text{CO}^* + \text{H}^* \rightarrow \text{CHO}^* + ^*\text{}$             | 1.23                    | 1.28 | 1.08       | 1.19  |
| $\text{CO}^* + \text{H}^* \rightarrow \text{COH}^* + ^*\text{}$             | 1.85                    | 1.77 | 0.85       | 0.96  |
| $\text{CHO}^* + ^*\text{ } \rightarrow \text{CH}^* + \text{O}^*$            | 0.63                    | 0.58 | -0.73      | -0.77 |
| $\text{CHO}^* + \text{H}^* \rightarrow \text{CH}_2\text{O}^* + ^*\text{}$   | 0.45                    | 0.43 | 0.23       | 0.33  |
| $\text{CHO}^* + \text{H}^* \rightarrow \text{CHOH}^* + ^*\text{}$           | 1.17                    | 1.05 | 0.43       | 0.51  |
| $\text{CH}_2\text{O}^* + ^*\text{ } \rightarrow \text{CH}_2^* + \text{O}^*$ | 0.70                    | 0.63 | -0.65      | -0.74 |

**Table S2.** Adsorption energies ( $\Delta E_{\text{ads}}$  in eV) and the most stable adsorption sites of various intermediates in CO methanation on Co (0001). The  $\Delta E_{\text{ads}}$  of H and O are calculated with respect to  $1/2\text{H}_2$  and  $1/2\text{O}_2$  in gas phase. The calculated coverages ( $\theta$  in ML) of various intermediates in the microkinetic study at 503 K, 1atm and  $\text{H}_2/\text{CO}$  ratio of 2 are also listed. The coverages of CO and the vacant site are  $8.71 \times 10^{-1}$  and  $1.08 \times 10^{-3}$ , respectively.

| Intermediates          | $\Delta E_{\text{Ads}}$ | Site                                              | $\theta$               |
|------------------------|-------------------------|---------------------------------------------------|------------------------|
| H                      | -0.53                   | fcc                                               | $1.27 \times 10^{-1}$  |
| O                      | -2.62                   | hcp                                               | $1.02 \times 10^{-5}$  |
| C                      | -6.99                   | hcp                                               | $1.32 \times 10^{-15}$ |
| OH                     | -3.65                   | $\text{O}_{\text{hcp}}$                           | $3.96 \times 10^{-7}$  |
| CH                     | -6.42                   | $\text{C}_{\text{hcp}}$                           | $2.56 \times 10^{-10}$ |
| $\text{CH}_2$          | -3.98                   | $\text{C}_{\text{hcp}}$                           | $2.30 \times 10^{-11}$ |
| $\text{CH}_3$          | -1.97                   | $\text{C}_{\text{fcc}}$                           | $9.27 \times 10^{-8}$  |
| CHO                    | -2.21                   | $\text{C}_{\text{bri}}\text{-hcp-O}_{\text{bri}}$ | $2.06 \times 10^{-9}$  |
| COH                    | -4.27                   | $\text{C}_{\text{hcp}}$                           | $2.16 \times 10^{-7}$  |
| $\text{CH}_2\text{O}$  | -0.85                   | $\text{C}_{\text{bri}}\text{-hcp-O}_{\text{bri}}$ | $1.26 \times 10^{-9}$  |
| CHOH                   | -2.94                   | $\text{C}_{\text{hcp}}$                           | $5.73 \times 10^{-12}$ |
| $\text{CH}_3\text{O}$  | -2.81                   | $\text{O}_{\text{hcp}}$                           | $8.12 \times 10^{-4}$  |
| $\text{CH}_2\text{OH}$ | -1.58                   | $\text{C}_{\text{bri}}$                           | $2.07 \times 10^{-12}$ |
| HCOO                   | -3.06                   | $\text{O}_{\text{top}}\text{-O}_{\text{top}}$     | $1.34 \times 10^{-11}$ |
| COOH                   | -2.24                   | $\text{C}_{\text{top}}\text{-hcp-O}_{\text{bri}}$ | $1.14 \times 10^{-13}$ |
| $\text{H}_2\text{O}$   | -0.28                   | $\text{O}_{\text{top}}$                           | $2.48 \times 10^{-21}$ |

**Table S3.** Activation energies ( $\Delta E_{\text{act}}$  in eV) and reaction energies ( $\Delta H$  in eV) of forward reactions and distance of C-O, C-H or O-H ( $d$  in Å) at the TSs for various elementary steps in CO methanation on Co (0001).  $\Delta E_{\text{act}}$  and  $\Delta H$  are calculated with respected to separate adsorbed states. \* and X\* denote the vacant site and adsorbed X species, respectively. The calculated rates ( $r$  in  $\text{s}^{-1}\text{site}^{-1}$ ) of various elementary steps in the microkinetic study at 503 K, 1atm and  $\text{H}_2/\text{CO}$  ratio of 2 are also listed.

| Reactions                                                         | $\Delta E_{\text{act}}$ | $\Delta H$ | $d$  | $r$                    |
|-------------------------------------------------------------------|-------------------------|------------|------|------------------------|
| $\text{CO}^* + * = \text{C}^* + \text{O}^*$                       | 2.35                    | 0.67       | 1.83 | $2.51 \times 10^{-14}$ |
| $\text{CO}^* + \text{H}^* = \text{CHO}^* + *$                     | 1.23                    | 1.08       | 1.30 | $6.17 \times 10^{-6}$  |
| $\text{CO}^* + \text{H}^* = \text{COH}^* + *$                     | 1.85                    | 0.85       | 1.33 | $8.88 \times 10^{-8}$  |
| $\text{CHO}^* + * = \text{CH}^* + \text{O}^*$                     | 0.68                    | -0.73      | 1.78 | $3.12 \times 10^{-6}$  |
| $\text{COH}^* + * = \text{C}^* + \text{OH}^*$                     | 1.58                    | 0.09       | 2.02 | $3.01 \times 10^{-13}$ |
| $\text{CHO}^* + \text{H}^* = \text{CHOH}^* + *$                   | 1.17                    | 0.43       | 1.37 | $2.21 \times 10^{-9}$  |
| $\text{COH}^* + \text{H}^* = \text{CHOH}^* + *$                   | 0.70                    | 0.66       | 1.45 | $2.38 \times 10^{-7}$  |
| $\text{CHO}^* + \text{H}^* = \text{CH}_2\text{O}^* + *$           | 0.45                    | 0.23       | 1.58 | $1.80 \times 10^{-6}$  |
| $\text{CH}_2\text{O}^* + * = \text{CH}_2^* + \text{O}^*$          | 0.70                    | -0.65      | 1.82 | $1.50 \times 10^{-6}$  |
| $\text{CHOH}^* + * = \text{CH}^* + \text{OH}^*$                   | 0.67                    | -0.89      | 1.88 | $1.10 \times 10^{-8}$  |
| $\text{CHOH}^* + \text{H}^* = \text{CH}_2\text{OH}^* + *$         | 0.67                    | 0.26       | 1.55 | $8.00 \times 10^{-8}$  |
| $\text{CH}_2\text{O}^* + \text{H}^* = \text{CH}_3\text{O}^* + *$  | 0.58                    | -0.38      | 1.58 | $1.22 \times 10^{-7}$  |
| $\text{CH}_2\text{O}^* + \text{H}^* = \text{CH}_2\text{OH}^* + *$ | 1.07                    | 0.46       | 1.38 | $8.75 \times 10^{-9}$  |
| $\text{CH}_2\text{OH}^* + * = \text{CH}_2^* + \text{OH}^*$        | 0.53                    | -0.84      | 1.98 | $8.87 \times 10^{-8}$  |
| $\text{CH}_3\text{O}^* + * = \text{CH}_3^* + \text{O}^*$          | 1.38                    | -0.42      | 1.90 | $1.35 \times 10^{-7}$  |
| $\text{C}^* + \text{H}^* = \text{CH}^* + *$                       | 0.72                    | -0.32      | 1.69 | $3.26 \times 10^{-13}$ |
| $\text{CH}^* + \text{H}^* = \text{CH}_2^* + *$                    | 0.55                    | 0.31       | 1.61 | $3.13 \times 10^{-6}$  |
| $\text{CH}_2^* + \text{H}^* = \text{CH}_3^* + *$                  | 0.54                    | -0.16      | 1.74 | $4.72 \times 10^{-6}$  |
| $\text{CH}_3^* + \text{H}^* = \text{CH}_4 + 2^*$                  | 1.04                    | 0.04       | 1.60 | $4.85 \times 10^{-6}$  |
| $\text{CO}^* + \text{O}^* = \text{CO}_2 + 2^*$                    | 1.37                    | 1.03       | 1.63 | $1.74 \times 10^{-6}$  |
| $\text{O}^* + \text{H}^* = \text{OH}^* + *$                       | 1.22                    | 0.28       | 1.33 | $6.01 \times 10^{-6}$  |
| $\text{OH}^* + \text{H}^* = \text{H}_2\text{O}^* + *$             | 1.49                    | 0.60       | 1.51 | $7.11 \times 10^{-10}$ |
| $2\text{OH}^* = \text{H}_2\text{O}^* + \text{O}^*$                | 0.57                    | 0.32       | 1.41 | $3.05 \times 10^{-6}$  |
| $\text{CO}^* + \text{OH}^* = \text{COOH}^* + *$                   | 1.31                    | 0.94       | 1.43 | $1.22 \times 10^{-10}$ |
| $\text{COOH}^* = \text{CO}_2 + \text{H}^*$                        | 1.00                    | -0.19      | 1.43 | $1.22 \times 10^{-10}$ |
| $\text{CHO}^* + \text{O}^* = \text{HCOO}^* + *$                   | 0.66                    | -0.29      | 1.82 | $6.02 \times 10^{-8}$  |
| $\text{HCOO}^* = \text{CO}_2 + \text{H}^*$                        | 0.94                    | 0.24       | 1.37 | $6.02 \times 10^{-8}$  |

**Table S4.** Adsorption energies ( $\Delta E_{\text{ads}}$  in eV) of  $\text{CH}_2\text{O}$  and  $\text{CHOH}$ , and the total energy difference  $\Delta E$  between adsorbed  $\text{CHOH}$  and  $\text{CH}_2\text{O}$  intermediates on various Co surfaces.

| Surfaces  | $\Delta E_{\text{ads}}(\text{CH}_2\text{O})$ | $\Delta E_{\text{ads}}(\text{CHOH})$ | $\Delta E$ |
|-----------|----------------------------------------------|--------------------------------------|------------|
| Co(0001)  | -0.85                                        | -2.94                                | 0.21       |
| Co(10-10) | -0.94                                        | -2.92                                | 0.32       |
| Co(11-20) | -1.23                                        | -3.04                                | 0.48       |
| Co(10-12) | -1.37                                        | -3.14                                | 0.53       |
| Step      | -1.28                                        | -3.01                                | 0.58       |
| Co(10-11) | -1.39                                        | -2.97                                | 0.71       |

**Figure S1.** (a) The coverage of intermediates and (b) the reaction order as a function of temperature on Co(0001).

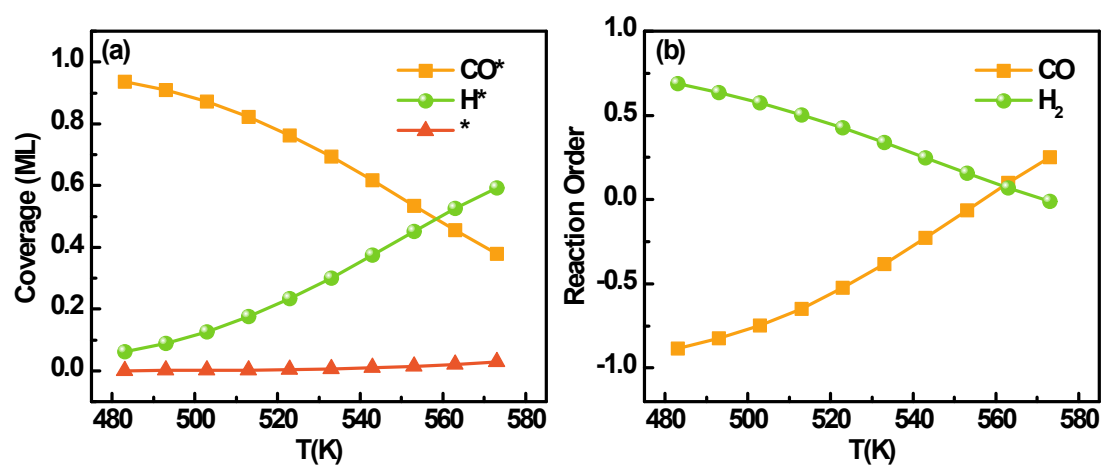

**Figure S2.** The effect of functionals on the adsorption energy  $\Delta E_{\text{ads}}$  of the C<sub>1</sub>-oxygenate intermediates on Co(0001).

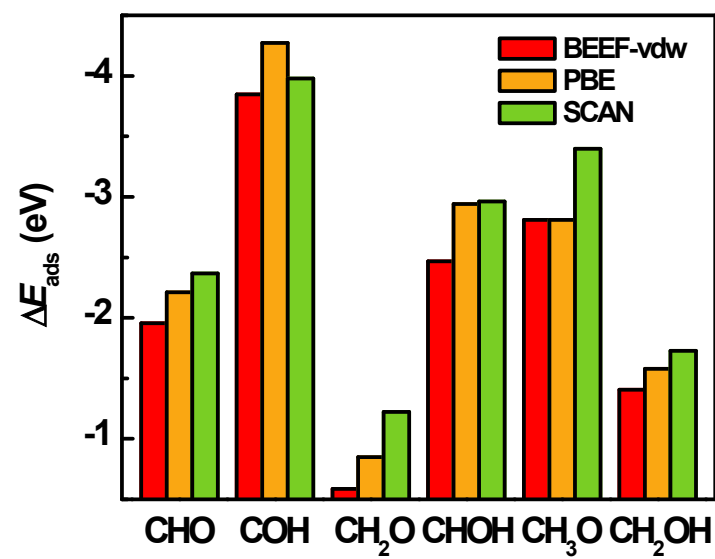

## Microkinetic Modeling

The reaction rate constant ( $k$ ) is given by the Eyring equation based on the transition-state theory:

$$k = \frac{k_B T}{h} e^{\frac{-\Delta E_{act}}{k_B T}} \dots\dots\dots (1)$$

where  $k_B$ ,  $T$ ,  $h$  and  $\Delta E_{act}$  represent the Boltzmann constant, absolute temperature, Planck constant and activation energy, respectively. The rate constant of adsorption ( $k_{ads}$ ) is calculated by the following:

$$k_{ads} = \frac{S \cdot P \cdot A}{\sqrt{2\pi m k_B T}} \dots\dots\dots (2)$$

where  $S$ ,  $P$ ,  $A$  and  $m$  are the sticking coefficient, partial pressure of the adsorbed species, the area of the adsorption site and the molecular mass of adsorbed species, respectively. The value of  $S$  is assumed to be one for all the species, since it is not very sensitive to the kinetic results.

The rate constant of desorption is calculated as

$$k_{des} = \frac{k_B T^3}{h^3} \frac{A(2\pi m k_B)}{\sigma \theta_{rot}} \exp\left(\frac{-E_{des}}{k_B T}\right) \dots\dots\dots(3)$$

where  $\sigma$ ,  $\theta_{rot}$  and  $E_{des}$  are the symmetry number, the characteristic temperature for rotation of adsorbed species and the activation energy of desorption.

Microkinetic simulations are performed by the MKMCXX program.<sup>[1]</sup> The reaction temperature ranges from 483 K to 573 K, and the total pressure is kept at 1 atm with H<sub>2</sub>/CO ratio of 2. The degree of thermodynamic rate control  $X_{RC,i}$  of step ( $i$ ),<sup>[2]</sup> which can qualitatively determine the significance of single step ( $i$ ) in the overall reaction, is defined as

$$X_{RC,i} = \frac{k_i}{r} \left( \frac{\partial r}{\partial k_i} \right)_{k_{j \neq i}, K_i} = \left( \frac{\partial \ln r}{\partial \ln k_i} \right)_{k_{j \neq i}, K_i} \dots\dots\dots (4)$$

where  $k_i$ ,  $K_i$  and  $r$  are the rate constant, the equilibrium constant for elementary step  $i$  and the reaction rate, respectively.

It is well-known that DFT methods do a poor job of treating CO adsorption on transition metal surfaces. Herein, we determined the CO adsorption energy of -1.30 eV from our experimental TPD data.<sup>[3]</sup> The CO adsorption energy is adjusted to experimental value by only adjusting the energy of gaseous CO, and the  $\Delta G$  of surface reactions are preserved.

## References

- [1] I. A. W. Filot, R. A. van Santen, E. J. M. Hensen, *Angew. Chem. Int. Ed.* **2014**, *53*, 12746-12750.
- [2] C. Stegelmann, A. Andreasen, C. T. Campbell, *J. Am. Chem. Soc.* **2009**, *131*, 8077-8082.
- [3] J. W. Wu, J. Chen, Q. Guo, H. Y. Su, D. X. Dai, X. M. Yang, *Surf. Sci.* **2017**, *663*, 56-61.
